# Supplementary material for: MeWRKY IIas, Subfamily Genes of WRKY Transcription Factors From Cassava, Play an Important Role in Disease Resistance
Source: Front Plant Sci. 2022 Jun 2;13:890555. doi: 10.3389/fpls.2022.890555 (PMC9201764; doi:10.3389/fpls.2022.890555)
Supplement: Supplementary Table 5 — Sequence logos of the conserved motifs in cassava WRKY proteins. [file Table_5.XLS]

## Sheet: Sheet1
Table S5 Sequence logos of the conserved motifs in cassava WRKY proteins.
Motif	Width	E value	Best possible match
1	24	2.4E-1683	=DISPIMG("ID_7F2B908809324402ADB7CADD186C1AB4",1)
2	29	1.0E-1909	=DISPIMG("ID_EAA01720F69E4DFB9C2C1DE58267701B",1)
3	8	3.8e-265	=DISPIMG("ID_74ABA09AAABE4E36A592873BCDF133BA",1)
4	29	2.4e-276	=DISPIMG("ID_6360F22E52E542B1BA20D5E26AD9DA76",1)
5	15	3.1e-265	=DISPIMG("ID_80F19890C7244ACBA057EEF56CA46315",1)
6	41	6.3e-241	=DISPIMG("ID_1EB7074DB8864CA4BD6E91F9D932F62F",1)
7	21	4.5e-234	=DISPIMG("ID_FAEB7838CEE0470B97E89775179CB04F",1)
8	29	3.5e-221	=DISPIMG("ID_301CA277DEE543069089638E6635D718",1)
9	29	3.3e-175	=DISPIMG("ID_36D5000EDA704910A0288DE39CC3E427",1)
10	29	1.7e-110	=DISPIMG("ID_7F979FF9E8694D299932D28DFEEC73CC",1)
Note: Numbers correspond to the motifs in Fig. 2
